# Supplementary material for: Metabolomics integrated elementary flux mode analysis in large metabolic networks
Source: PubMed Central journal article supplement (PMC4354105; doi:10.1038/srep08930), 2015-03-10
Supplement: srep08930-s1.pdf [file srep08930-s1.pdf]

# Supplementary Material: Metabolomics integrated elementary flux mode analysis in large metabolic networks

Matthias P. Gerstl, David E. Ruckerbauer, Diethard Mattanovich, Christian Jungreuthmayer & Jürgen Zanghellini

**S1–S3** show infeasible patterns for different cultivation media. Diagrams were created with Cytoscape <sup>1</sup> according to the *E. coli* core model <sup>2</sup> with additional glycerol exchange (model M2). Metabolites are drawn as squares and reactions as diamonds. Reactions of the infeasible pattern are marked red. Directions of the reactions are drawn according to the model, except for those that are part of a pattern, where only the infeasible direction is plotted. Infeasibility patterns are also listed in supplementary Table **S9**.

Table **S1**: Minimal infeasible patterns in *E. coli* aerobically growing on glucose.

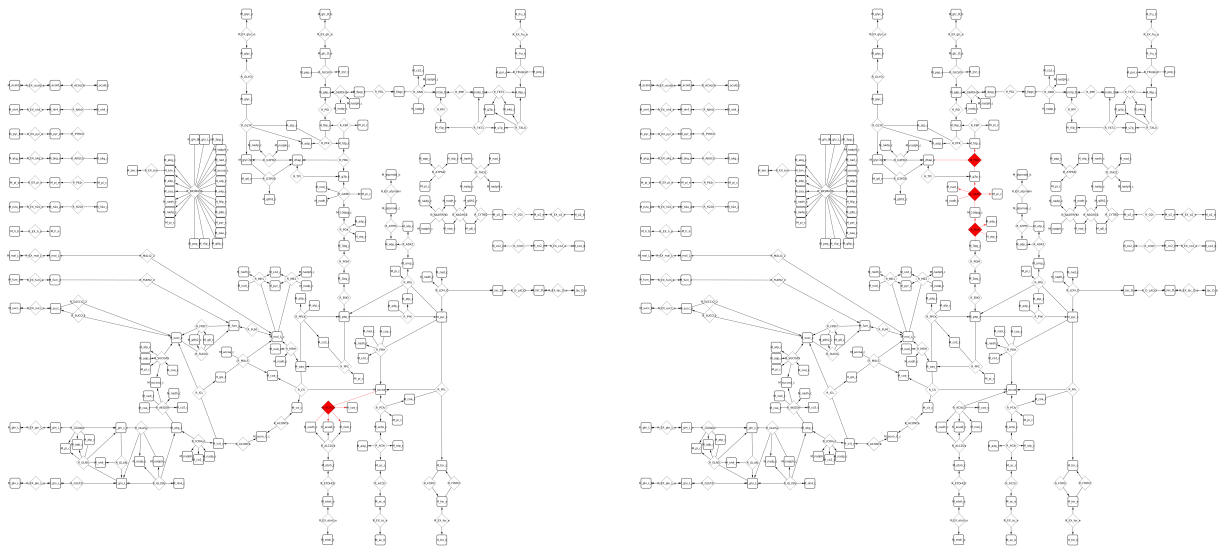

Table **S1** continues on next page.

Table S1 continues from previous page.

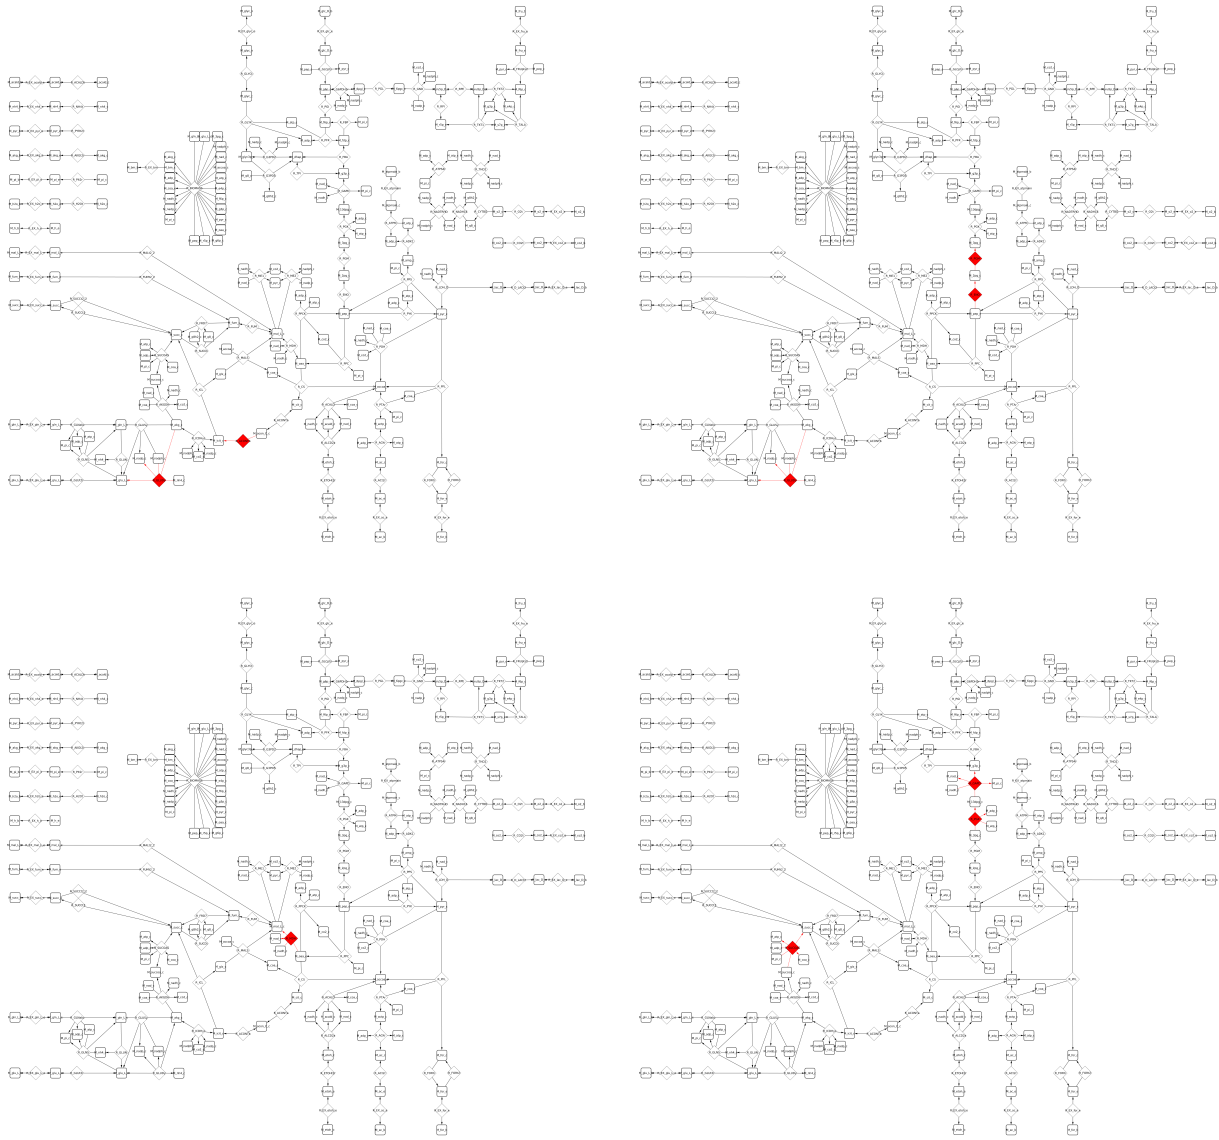

Table S1 ends.

Table S2: Minimal infeasible patterns in *E. coli* aerobically growing on glycerol.

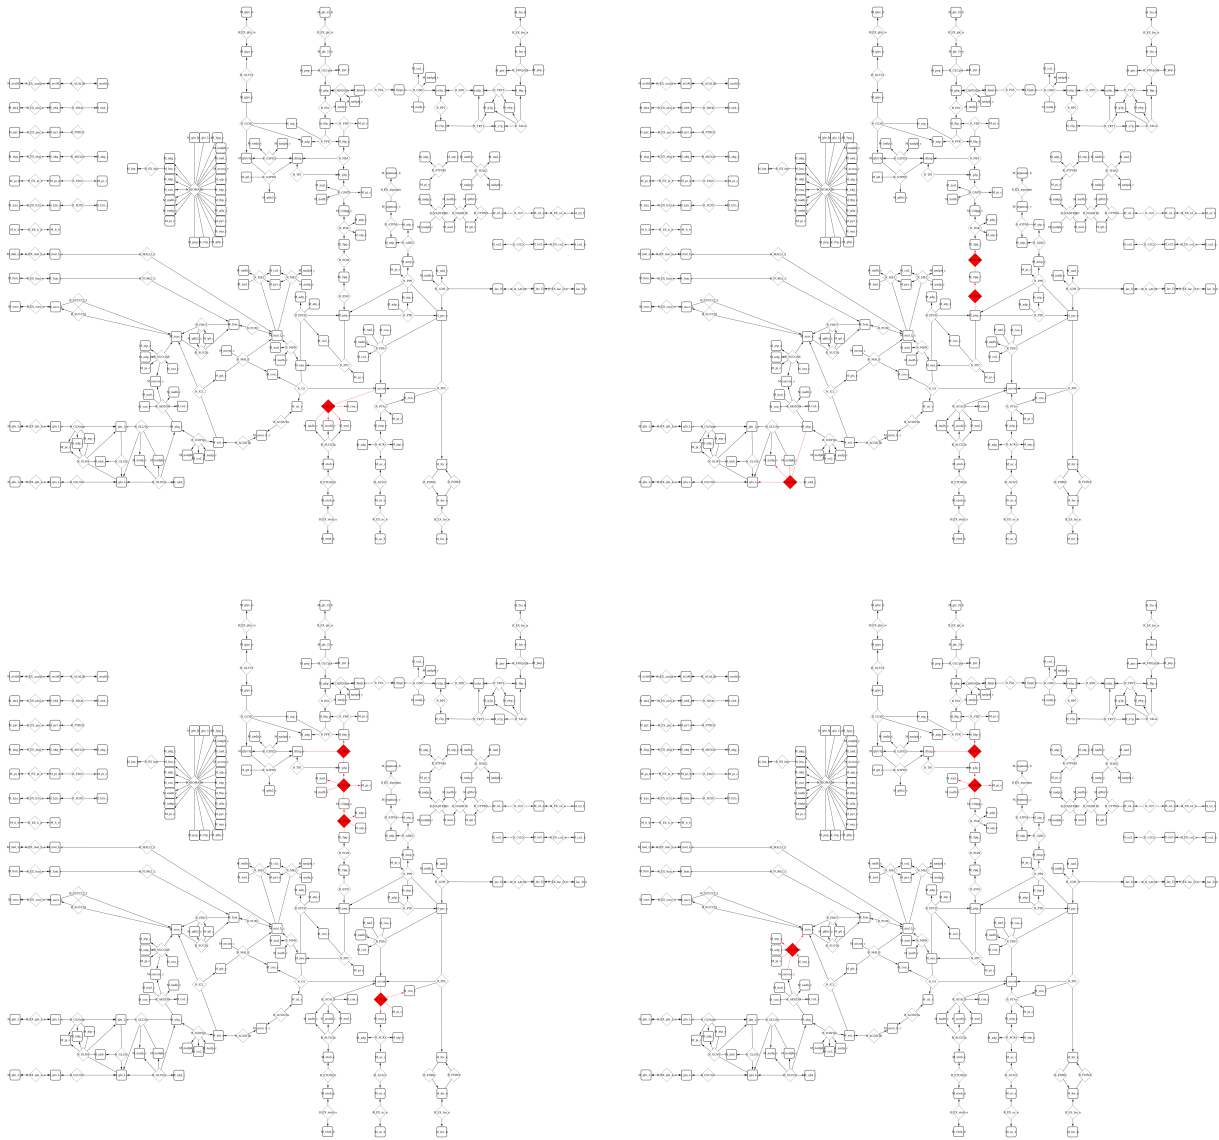

Table S2 continues on next page.

Table S2 continues from previous page.

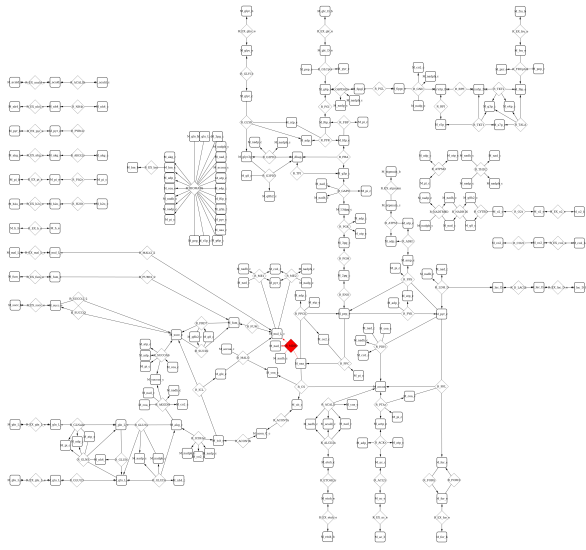

Table S2 ends.

Table S3: Minimal infeasible patterns in *E. coli* aerobically growing on acetate.

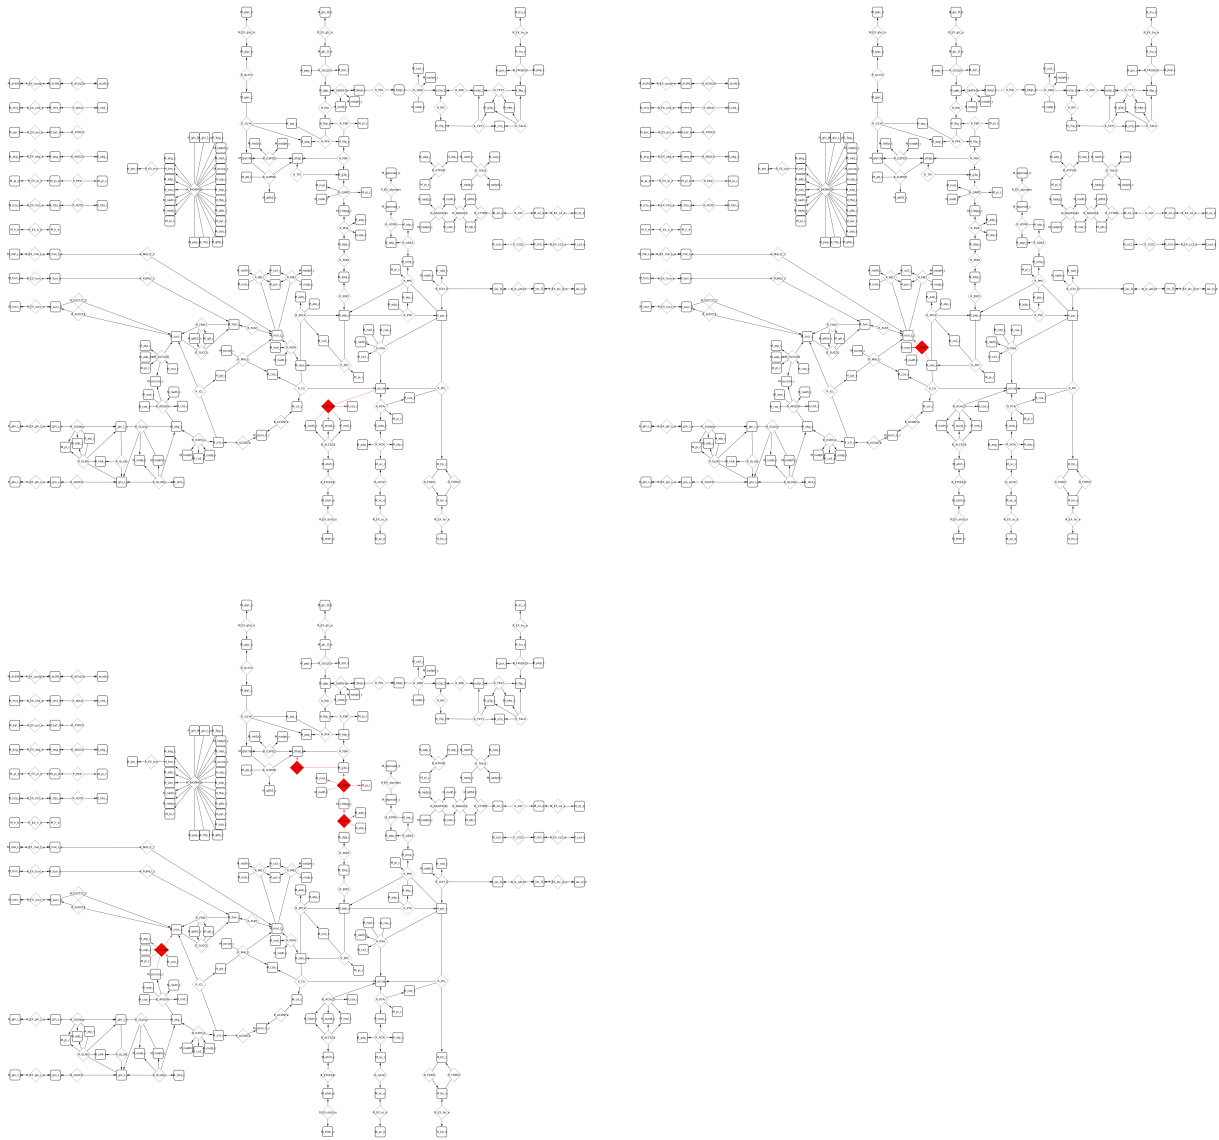

Table S3 ends.

Table S4: Topological properties of used *E. coli* models.

| model   | reactions    |            | metabolites | rank |
|---------|--------------|------------|-------------|------|
|         | irreversible | reversible |             |      |
| M1      | 37           | 59         | 73          | 68   |
| M2      | 39           | 62         | 76          | 71   |
| M2-glc  | 53           | 48         | 76          | 71   |
| M2-glyc | 53           | 48         | 76          | 71   |
| M2-ac   | 53           | 48         | 76          | 71   |
| M3      | 115          | 94         | 178         | 171  |

Table S5: Performance comparison of model M2 grown on glucose. +, 0, - show the number of (feasible) intermediate EFMs (*i*EFM), having a positive, zero or negative values at reaction (iteration step) *i*. tEFMA checks the feasibility of all + and - *i*EFMs. (The total number of checks per iterations is listed in column “LP”). During post-processing (PP) all enumerated (*i*)EFMs are checked in tEFMA. The columns “cand.” and “new” *i*EFM, list the number of potentially new *i*EFMs and the actual number of new *i*EFMs found in iteration *i*. The column “diff” lists the difference in the number of new *i*EFMs for both methods. Bold values in the table indicate infeasible *i*EFMs were detected.

| <i>i</i> | <i>i</i> EFM |     |       | LP     | tEFMA                 |     |            | <i>i</i> EFM |        | EFMA         |       |        | diff        |         |         |
|----------|--------------|-----|-------|--------|-----------------------|-----|------------|--------------|--------|--------------|-------|--------|-------------|---------|---------|
|          | +            | 0   | -     |        | feasible <i>i</i> EFM |     |            | cand.        | new    | <i>i</i> EFM |       |        |             | cand.   | new     |
|          |              |     |       |        | +                     | 0   | -          |              |        | +            | 0     | -      |             |         |         |
| 0        | 1            | 39  | 2     | 3      | 1                     | 39  | 2          | 2            | 2      | 1            | 39    | 2      | 2           | 2       | 0       |
| 1        | 3            | 39  | 0     | 3      | 3                     | 39  | 0          | 0            | 0      | 3            | 39    | 0      | 0           | 0       | 0       |
| 2        | 2            | 39  | 1     | 3      | 2                     | 39  | 1          | 2            | 2      | 2            | 39    | 1      | 2           | 2       | 0       |
| 3        | 2            | 40  | 1     | 3      | 2                     | 40  | 1          | 2            | 2      | 2            | 40    | 1      | 2           | 2       | 0       |
| 4        | 3            | 40  | 1     | 4      | 3                     | 40  | 1          | 3            | 2      | 3            | 40    | 1      | 3           | 2       | 0       |
| 5        | 4            | 40  | 1     | 5      | 4                     | 40  | 1          | 4            | 2      | 4            | 40    | 1      | 4           | 2       | 0       |
| 6        | 2            | 39  | 5     | 7      | 2                     | 39  | 5          | 10           | 10     | 2            | 39    | 5      | 10          | 10      | 0       |
| 7        | 10           | 40  | 1     | 11     | 10                    | 40  | 1          | 10           | 10     | 10           | 40    | 1      | 10          | 10      | 0       |
| 8        | 1            | 39  | 20    | 21     | 1                     | 39  | 20         | 20           | 20     | 1            | 39    | 20     | 20          | 20      | 0       |
| 9        | 3            | 40  | 17    | 20     | 3                     | 40  | 17         | 51           | 28     | 3            | 40    | 17     | 51          | 28      | 0       |
| 10       | 18           | 41  | 12    | 30     | <b>10</b>             | 41  | 12         | 120          | 17     | 18           | 41    | 12     | 216         | 22      | 5       |
| 11       | 14           | 48  | 6     | 20     | 14                    | 48  | 6          | 84           | 6      | 18           | 53    | 10     | 180         | 10      | 4       |
| 12       | 16           | 40  | 12    | 28     | 16                    | 40  | <b>7</b>   | 112          | 13     | 22           | 40    | 19     | 418         | 34      | 21      |
| 13       | 29           | 39  | 1     | 30     | 29                    | 39  | 1          | 29           | 28     | 55           | 40    | 1      | 55          | 54      | 26      |
| 14       | 2            | 66  | 28    | 30     | 2                     | 66  | 28         | 56           | 2      | 2            | 93    | 54     | 108         | 2       | 0       |
| 15       | 21           | 37  | 12    | 33     | <b>17</b>             | 37  | <b>10</b>  | 170          | 82     | 46           | 37    | 14     | 644         | 212     | 130     |
| 16       | 5            | 34  | 97    | 102    | 5                     | 34  | <b>86</b>  | 430          | 77     | 5            | 34    | 256    | 1,280       | 139     | 62      |
| 17       | 1            | 35  | 80    | 81     | 1                     | 35  | 80         | 80           | 80     | 1            | 36    | 141    | 141         | 141     | 61      |
| 18       | 40           | 26  | 50    | 90     | 40                    | 26  | 50         | 2,000        | 427    | 64           | 26    | 88     | 5,632       | 746     | 319     |
| 19       | 101          | 211 | 181   | 282    | 101                   | 211 | 181        | 18,281       | 239    | 135          | 311   | 390    | 52,650      | 464     | 225     |
| 20       | 451          | 36  | 64    | 515    | 451                   | 36  | 64         | 28,864       | 869    | 767          | 36    | 107    | 82,069      | 1,524   | 655     |
| 21       | 93           | 130 | 1,133 | 1,226  | <b>90</b>             | 130 | <b>693</b> | 62,370       | 970    | 100          | 131   | 2,096  | 209,600     | 1,778   | 808     |
| 22       | 1,139        | 49  | 2     | 1,141  | <b>1,052</b>          | 49  | <b>1</b>   | 1,052        | 3      | 1,906        | 58    | 45     | 85,770      | 710     | 707     |
| 23       | 315          | 65  | 724   | 1,039  | <b>309</b>            | 65  | <b>723</b> | 223,407      | 1,603  | 702          | 135   | 1,837  | 1,289,574   | 6,498   | 4,895   |
| 24       | 456          | 617 | 904   | 1,360  | 456                   | 617 | 904        | 412,224      | 788    | 3,377        | 1,828 | 2,130  | 7,193,010   | 3,678   | 2,890   |
| 25       | 1,527        | 265 | 69    | 1,596  | 1,527                 | 265 | 69         | 105,363      | 564    | 8,260        | 502   | 121    | 999,460     | 1,550   | 986     |
| 26       | 1,085        | 282 | 989   | 2,074  | 1,085                 | 282 | <b>983</b> | 1,066,555    | 5,188  | 4,193        | 441   | 5,678  | 23,807,854  | 26,025  | 20,837  |
| 27       | 2,833        | 124 | 3,598 | 6,431  | 2,833                 | 124 | 3,598      | 10,193,134   | 29,433 | 10,949       | 168   | 19,542 | 213,965,358 | 159,271 | 129,838 |
| PP       | -            | -   | -     | 32,390 | -                     | -   | -          | -            | -      | -            | -     | -      | -           | -       | -       |
| Σ        |              |     |       | 48,578 |                       |     |            | 12,114,435   | 40,467 |              |       |        | 247,694,123 | 202,936 | 162,469 |

Table S6: Performance comparison of model M2 grown on glycerol. +, 0, - show the number of (feasible) intermediate EFMs (*i*EFM), having a positive, zero or negative values at reaction (iteration step) *i*. tEFMA checks the feasibility of all + and - *i*EFMs. (The total number of checks per iterations is listed in column “LP”). During post-processing (PP) all enumerated (*i*)EFMs are checked in tEFMA. The columns “cand.” and “new” *i*EFM, list the number of potentially new *i*EFMs and the actual number of new *i*EFMs found in iteration *i*. The column “diff” lists the difference in the number of new *i*EFMs for both methods. Bold values in the table indicate infeasible *i*EFMs were detected.

| <i>i</i> | <i>i</i> EFM |       |        | LP      | tEFMA         |       |               | <i>i</i> EFM |         | EFMA   |       |        |             |         | diff   |
|----------|--------------|-------|--------|---------|---------------|-------|---------------|--------------|---------|--------|-------|--------|-------------|---------|--------|
|          | +            | 0     | -      |         | feasible      | +     | 0             | -            | cand.   | new    | +     | 0      | -           | cand.   |        |
| 0        | 2            | 40    | 1      | 3       | 2             | 40    | 1             | 2            | 2       | 2      | 40    | 1      | 2           | 2       | 0      |
| 1        | 1            | 41    | 2      | 3       | 1             | 41    | 2             | 2            | 2       | 1      | 41    | 2      | 2           | 2       | 0      |
| 2        | 1            | 41    | 2      | 3       | 1             | 41    | 2             | 2            | 2       | 1      | 41    | 2      | 2           | 2       | 0      |
| 3        | 3            | 41    | 0      | 3       | 3             | 41    | 0             | 0            | 0       | 3      | 41    | 0      | 0           | 0       | 0      |
| 4        | 2            | 41    | 1      | 3       | 2             | 41    | 1             | 2            | 2       | 2      | 41    | 1      | 2           | 2       | 0      |
| 5        | 2            | 41    | 2      | 4       | 2             | 41    | 2             | 4            | 3       | 2      | 41    | 2      | 4           | 3       | 0      |
| 6        | 3            | 41    | 2      | 5       | 3             | 41    | 2             | 6            | 3       | 3      | 41    | 2      | 6           | 3       | 0      |
| 7        | 1            | 41    | 5      | 6       | 1             | 41    | 5             | 5            | 5       | 1      | 41    | 5      | 5           | 5       | 0      |
| 8        | 6            | 40    | 1      | 7       | 6             | 40    | 1             | 6            | 6       | 6      | 40    | 1      | 6           | 6       | 0      |
| 9        | 1            | 39    | 12     | 13      | 1             | 39    | 12            | 12           | 12      | 1      | 39    | 12     | 12          | 12      | 0      |
| 10       | 13           | 38    | 1      | 14      | 13            | 38    | 1             | 13           | 12      | 13     | 38    | 1      | 13          | 12      | 0      |
| 11       | 2            | 49    | 12     | 14      | 2             | 49    | 12            | 24           | 2       | 2      | 49    | 12     | 24          | 2       | 0      |
| 12       | 1            | 34    | 18     | 19      | 1             | 34    | 18            | 18           | 18      | 1      | 34    | 18     | 18          | 18      | 0      |
| 13       | 10           | 38    | 5      | 15      | 10            | 38    | 5             | 50           | 42      | 10     | 38    | 5      | 50          | 42      | 0      |
| 14       | 55           | 34    | 1      | 56      | 55            | 34    | 1             | 55           | 16      | 55     | 34    | 1      | 55          | 16      | 0      |
| 15       | 55           | 41    | 9      | 64      | 55            | 41    | 9             | 495          | 17      | 55     | 41    | 9      | 495         | 17      | 0      |
| 16       | 18           | 41    | 54     | 72      | 18            | 41    | 54            | 972          | 62      | 18     | 41    | 54     | 972         | 62      | 0      |
| 17       | 55           | 41    | 25     | 80      | 55            | 41    | 25            | 1,375        | 33      | 55     | 41    | 25     | 1,375       | 33      | 0      |
| 18       | 46           | 34    | 49     | 95      | <b>33</b>     | 34    | 49            | 1,617        | 157     | 46     | 34    | 49     | 2,254       | 218     | 61     |
| 19       | 156          | 46    | 22     | 178     | 156           | 46    | 22            | 3,432        | 98      | 217    | 47    | 34     | 7,378       | 122     | 24     |
| 20       | 21           | 43    | 236    | 257     | 21            | 43    | 236           | 4,956        | 1,137   | 22     | 50    | 314    | 6,908       | 1,343   | 206    |
| 21       | 420          | 28    | 753    | 1,173   | 420           | 28    | <b>708</b>    | 297,360      | 5,346   | 517    | 30    | 868    | 448,756     | 6,604   | 1,258  |
| 22       | 1,333        | 1,917 | 2,544  | 3,877   | 1,333         | 1,917 | <b>2,534</b>  | 3,377,822    | 3,074   | 1,641  | 2,198 | 3,312  | 5,434,992   | 3,954   | 880    |
| 23       | 5,706        | 348   | 270    | 5,976   | 5,706         | 348   | 270           | 1,540,620    | 4,707   | 6,822  | 620   | 351    | 2,394,522   | 5,732   | 1,025  |
| 24       | 4,971        | 342   | 5,448  | 10,419  | 4,971         | 342   | 5,448         | 27,082,008   | 29,120  | 5,665  | 419   | 7,090  | 40,164,850  | 36,386  | 7,266  |
| 25       | 33,531       | 161   | 741    | 34,272  | <b>33,530</b> | 161   | 741           | 24,845,730   | 14,225  | 41,313 | 192   | 965    | 39,867,045  | 17,733  | 3,508  |
| 26       | 2,216        | 605   | 45,095 | 47,311  | <b>1,880</b>  | 605   | <b>11,946</b> | 22,458,480   | 13,538  | 2,523  | 710   | 56,005 | 141,300,615 | 22,038  | 8,500  |
| 27       | 7,157        | 714   | 8,152  | 15,309  | <b>6,191</b>  | 714   | <b>7,295</b>  | 45,163,345   | 21,729  | 11,634 | 1,250 | 12,387 | 144,110,358 | 42,902  | 21,173 |
| 28       | 4,022        | 5,002 | 19,610 | 23,632  | 4,022         | 5,002 | <b>19,570</b> | 78,710,540   | 12,697  | 15,754 | 8,594 | 31,438 | 495,274,252 | 36,165  | 23,468 |
| pp       | -            | -     | -      | 21,721  | -             | -     | -             | -            | -       | -      | -     | -      | -           | -       | -      |
| Σ        |              |       |        | 164,594 |               |       |               | 203,488,953  | 106,067 |        |       |        | 869,014,973 | 173,436 | 67,369 |



Table S7: Performance comparison of model M2 grown on acetate. +, 0, - show the number of (feasible) intermediate EFMs (*i*EFM), having a positive, zero or negative values at reaction (iteration step) *i*. tEFMA checks the feasibility of all + and - *i*EFMs. (The total number of checks per iterations is listed in column “LP”). During post-processing (PP) all enumerated (*i*)EFMs are checked in tEFMA. The columns “cand.” and “new” *i*EFM, list the number of potentially new *i*EFMs and the actual number of new *i*EFMs found in iteration *i*. The column “diff” lists the difference in the number of new *i*EFMs for both methods. Bold values in the table indicate infeasible *i*EFMs were detected.

| <i>i</i> | tEFMA        |     |       |       |                       |     |              |              | EFMA  |              |     |       |           |        | diff  |
|----------|--------------|-----|-------|-------|-----------------------|-----|--------------|--------------|-------|--------------|-----|-------|-----------|--------|-------|
|          | <i>i</i> EFM |     |       | LP    | feasible <i>i</i> EFM |     |              | <i>i</i> EFM |       | <i>i</i> EFM |     |       | cand.     | new    |       |
|          | +            | 0   | -     |       | +                     | 0   | -            | cand.        | new   | +            | 0   | -     |           |        |       |
| 0        | 2            | 38  | 1     | 3     | 2                     | 38  | 1            | 2            | 2     | 2            | 38  | 1     | 2         | 2      | 0     |
| 1        | 1            | 39  | 2     | 3     | 1                     | 39  | 2            | 2            | 2     | 1            | 39  | 2     | 2         | 2      | 0     |
| 2        | 1            | 39  | 2     | 3     | 1                     | 39  | 2            | 2            | 2     | 1            | 39  | 2     | 2         | 2      | 0     |
| 3        | 1            | 39  | 2     | 3     | 1                     | 39  | 2            | 2            | 2     | 1            | 39  | 2     | 2         | 2      | 0     |
| 4        | 2            | 39  | 1     | 3     | 2                     | 39  | 1            | 2            | 2     | 2            | 39  | 1     | 2         | 2      | 0     |
| 5        | 2            | 39  | 2     | 4     | 2                     | 39  | 2            | 4            | 3     | 2            | 39  | 2     | 4         | 3      | 0     |
| 6        | 5            | 39  | 0     | 5     | 5                     | 39  | 0            | 0            | 0     | 5            | 39  | 0     | 0         | 0      | 0     |
| 7        | 3            | 39  | 2     | 5     | 3                     | 39  | 2            | 6            | 3     | 3            | 39  | 2     | 6         | 3      | 0     |
| 8        | 1            | 39  | 5     | 6     | 1                     | 39  | 5            | 5            | 5     | 1            | 39  | 5     | 5         | 5      | 0     |
| 9        | 6            | 38  | 1     | 7     | 6                     | 38  | 1            | 6            | 5     | 6            | 38  | 1     | 6         | 6      | 1     |
| 10       | 12           | 37  | 1     | 13    | <b>11</b>             | 37  | 1            | 11           | 10    | 12           | 37  | 1     | 12        | 12     | 2     |
| 11       | 20           | 38  | 1     | 21    | 20                    | 38  | 1            | 20           | 10    | 21           | 39  | 1     | 21        | 10     | 0     |
| 12       | 2            | 38  | 28    | 30    | 2                     | 38  | 28           | 56           | 30    | 2            | 40  | 28    | 56        | 30     | 0     |
| 13       | 2            | 64  | 4     | 6     | 2                     | 64  | 4            | 8            | 8     | 2            | 66  | 4     | 8         | 8      | 0     |
| 14       | 2            | 68  | 4     | 6     | 2                     | 68  | 4            | 8            | 4     | 2            | 70  | 4     | 8         | 4      | 0     |
| 15       | 38           | 34  | 2     | 40    | 38                    | 34  | 2            | 76           | 48    | 38           | 36  | 2     | 76        | 76     | 28    |
| 16       | 74           | 57  | 17    | 91    | <b>50</b>             | 57  | <b>13</b>    | 650          | 206   | 74           | 59  | 17    | 1,258     | 340    | 134   |
| 17       | 127          | 40  | 170   | 297   | 127                   | 40  | 170          | 21,590       | 474   | 151          | 46  | 276   | 41,676    | 1,348  | 874   |
| 18       | 2            | 39  | 600   | 602   | 2                     | 39  | 600          | 1,200        | 97    | 4            | 45  | 1,496 | 5,984     | 244    | 147   |
| 19       | 107          | 28  | 4     | 111   | 107                   | 28  | <b>3</b>     | 321          | 197   | 202          | 36  | 55    | 11,110    | 812    | 615   |
| 20       | 4            | 52  | 278   | 282   | 4                     | 52  | <b>276</b>   | 1,104        | 446   | 8            | 92  | 950   | 7,600     | 1,483  | 1,037 |
| 21       | 308          | 63  | 131   | 439   | 308                   | 63  | 131          | 40,348       | 604   | 1,139        | 115 | 329   | 374,731   | 1,931  | 1,327 |
| 22       | 947          | 28  | 0     | 947   | 947                   | 28  | 0            | 0            | 0     | 3,147        | 38  | 0     | 0         | 0      | 0     |
| 23       | 256          | 48  | 671   | 927   | 256                   | 48  | 671          | 171,776      | 188   | 304          | 56  | 2,825 | 858,800   | 702    | 514   |
| 24       | 477          | 21  | 151   | 628   | <b>397</b>            | 21  | <b>74</b>    | 29,378       | 1,190 | 830          | 24  | 208   | 172,640   | 4,299  | 3,109 |
| 25       | 31           | 27  | 1,678 | 1,709 | 31                    | 27  | <b>1,630</b> | 50,530       | 917   | 33           | 28  | 5,092 | 168,036   | 1,318  | 401   |
| 26       | 29           | 353 | 611   | 640   | 29                    | 353 | <b>593</b>   | 17,197       | 536   | 30           | 431 | 918   | 27,540    | 855    | 319   |
| PP       | -            | -   | -     | 945   | -                     | -   | -            | -            | -     | -            | -   | -     | -         | -      | -     |
| Σ        |              |     |       | 7,776 |                       |     |              | 351,501      | 4,991 |              |     |       | 1,697,127 | 13,499 | 8,508 |

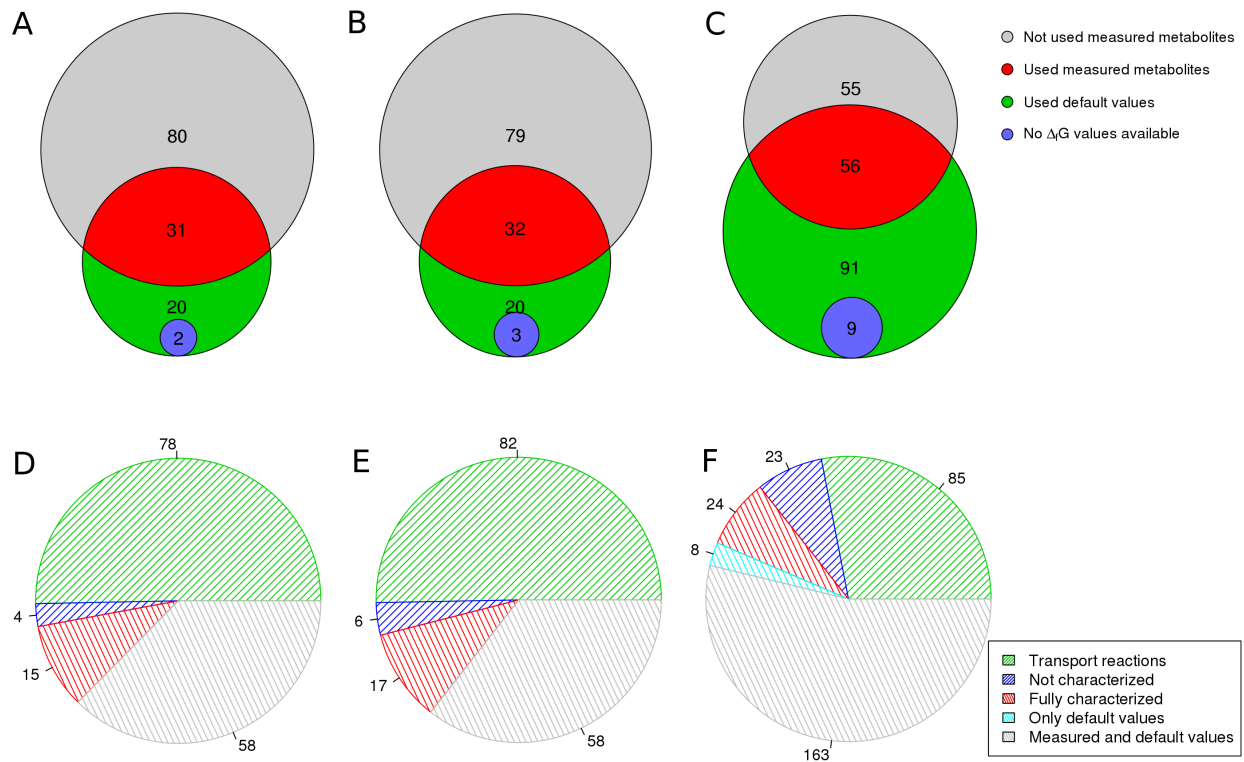

**Figure S1:** Characterization of usable reactions for thermodynamic checks. (A) Out of 111 measured metabolites <sup>3</sup> 31 could be used in the *E. coli* core model M1. For 20 additional metabolites default values were used. Two metabolites, including the biomass, could not be used because of lack of available  $\Delta_f G$  value. (B) shows the data for model M2 and (C) for M3. (D) 73 irreversible reactions of the model M1 were used for thermodynamic checks, whereof 15 were fully characterized as for all involved metabolites measured data were available and 58 were partly characterized. 78 transport reactions were not used for the checks as well as 4 uncharacterized reactions, because of missing  $\Delta_f G$  information. (E) shows the data for model M2 and (F) for model M3.

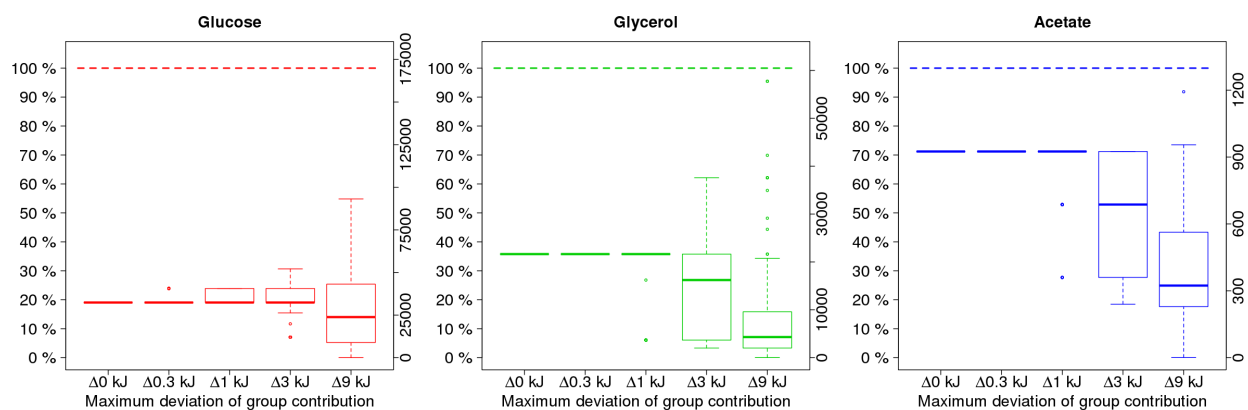

Figure S2: The box-plots show the number of calculated EFMs as a function of perturbed  $\Delta_r G$  values compared to not perturbed results. Therefore  $\Delta_r G$  values for glucose, glycerol and acetate were randomly perturbed by 0, 0.3, 1, 3 and 9 kJ and EFMs of model M2 were calculated with tEFMA. Each box-plot represents 100 runs.

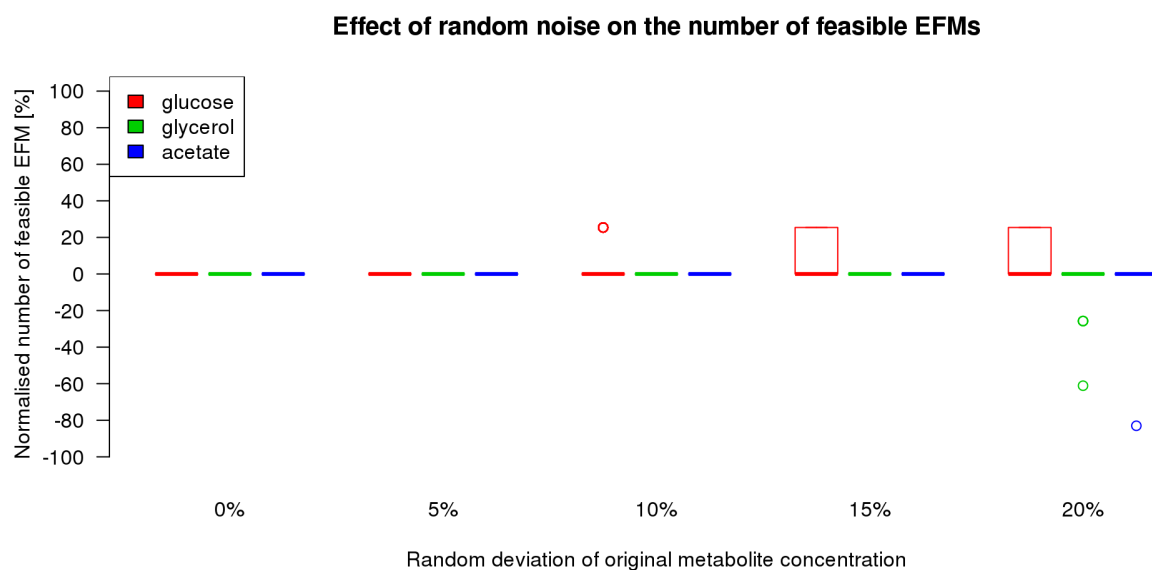

Figure S3: Upper and lower metabolite concentration limits for glucose, glycerol and acetate were randomly perturbed by  $\pm 5\%$ ,  $\pm 10\%$ ,  $\pm 15\%$  and  $\pm 20\%$  and EFMs were calculated. The box-plots show the number of calculated EFMs normalized to not perturbed results averaged over 100 runs each. Note that up to  $\pm 15\%$  box-plots are highly degenerated and except for outliers (open circles) only the median value is visible.

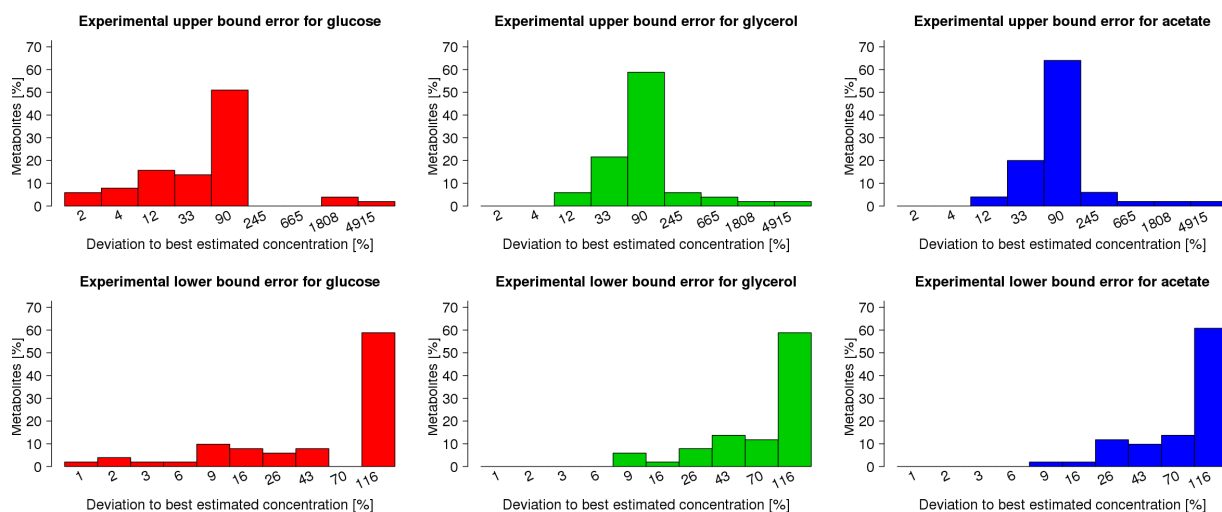

Figure S4: Deviation of the upper and lower bound for glucose (left panels), glycerol (middle panels) and acetate (right panels) from the best estimated concentrations as published by <sup>3</sup>. The deviation was calculated by following formula:

$$\text{deviation of metabolite} = \frac{\text{upper or lower concentration}}{\text{best estimated concentration}}$$

The histogram shows the relative number of metabolites as function of the deviation. Note, that the x axis is in logarithmic scale. For all three metabolites, the peak for upper bound concentration is 90% above the best estimated value and below 116% for lower bound concentrations.

Table S8: Changes in the upper and lower concentration bounds on glucose (red), glycerol (green), and acetate (blue) upon random perturbations. The full lines illustrate the non-perturbed values illustrated in Figure S4.

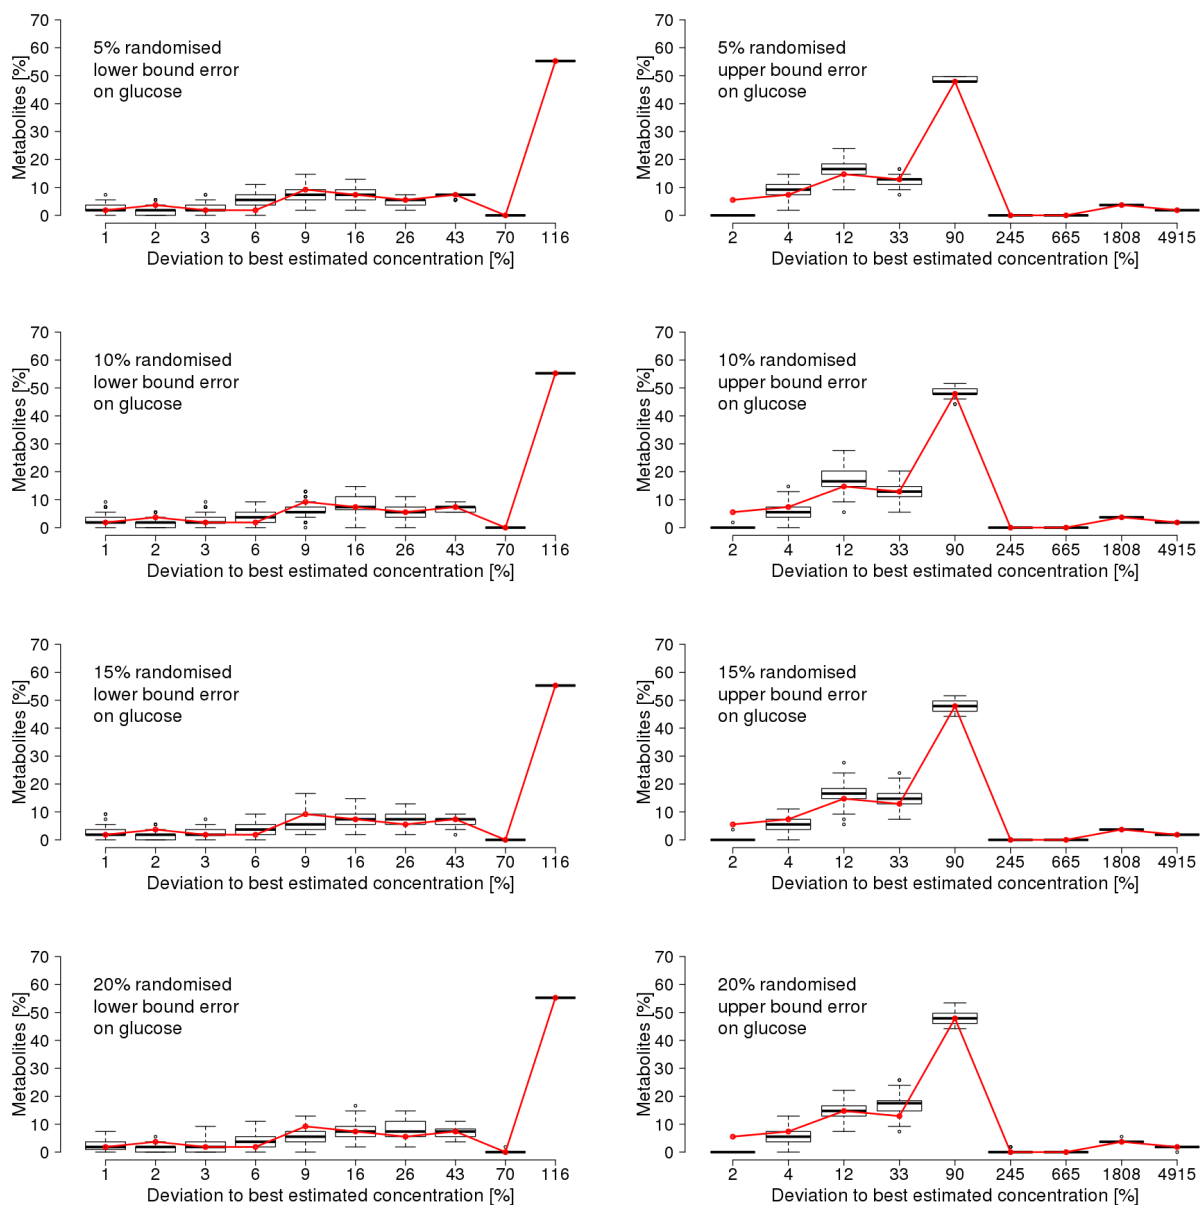

Table S8 continues on next page.

Table S8 continues from previous page.

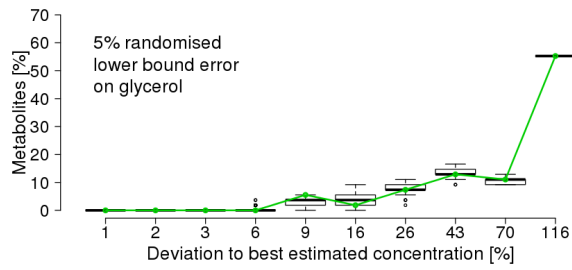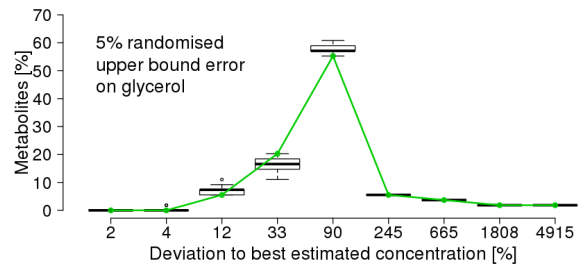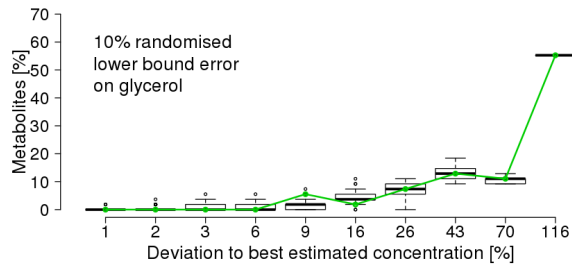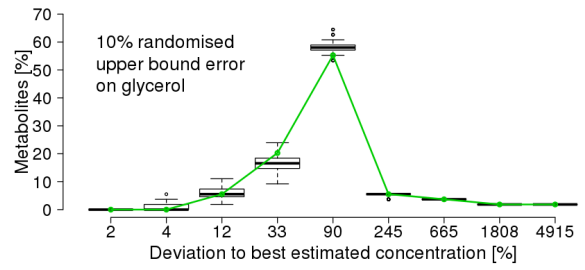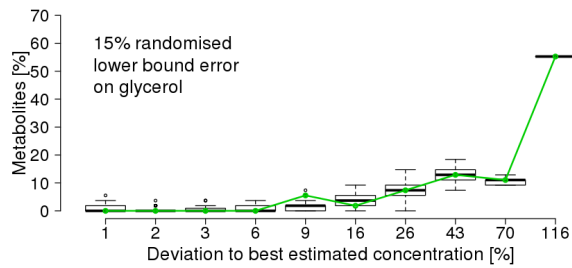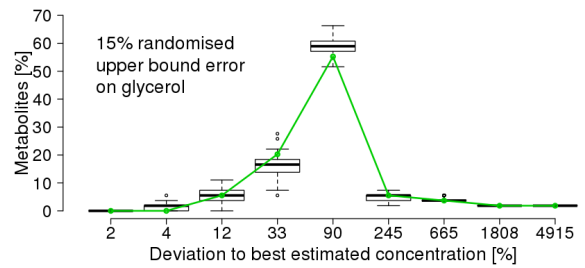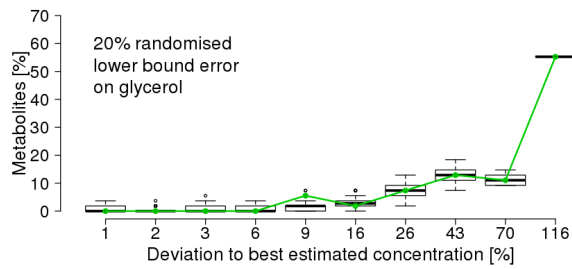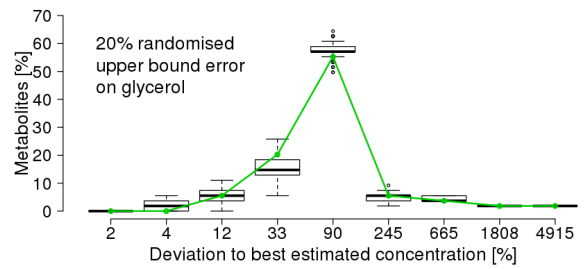

Table S8 continues on next page.

Table S8 continues from previous page.

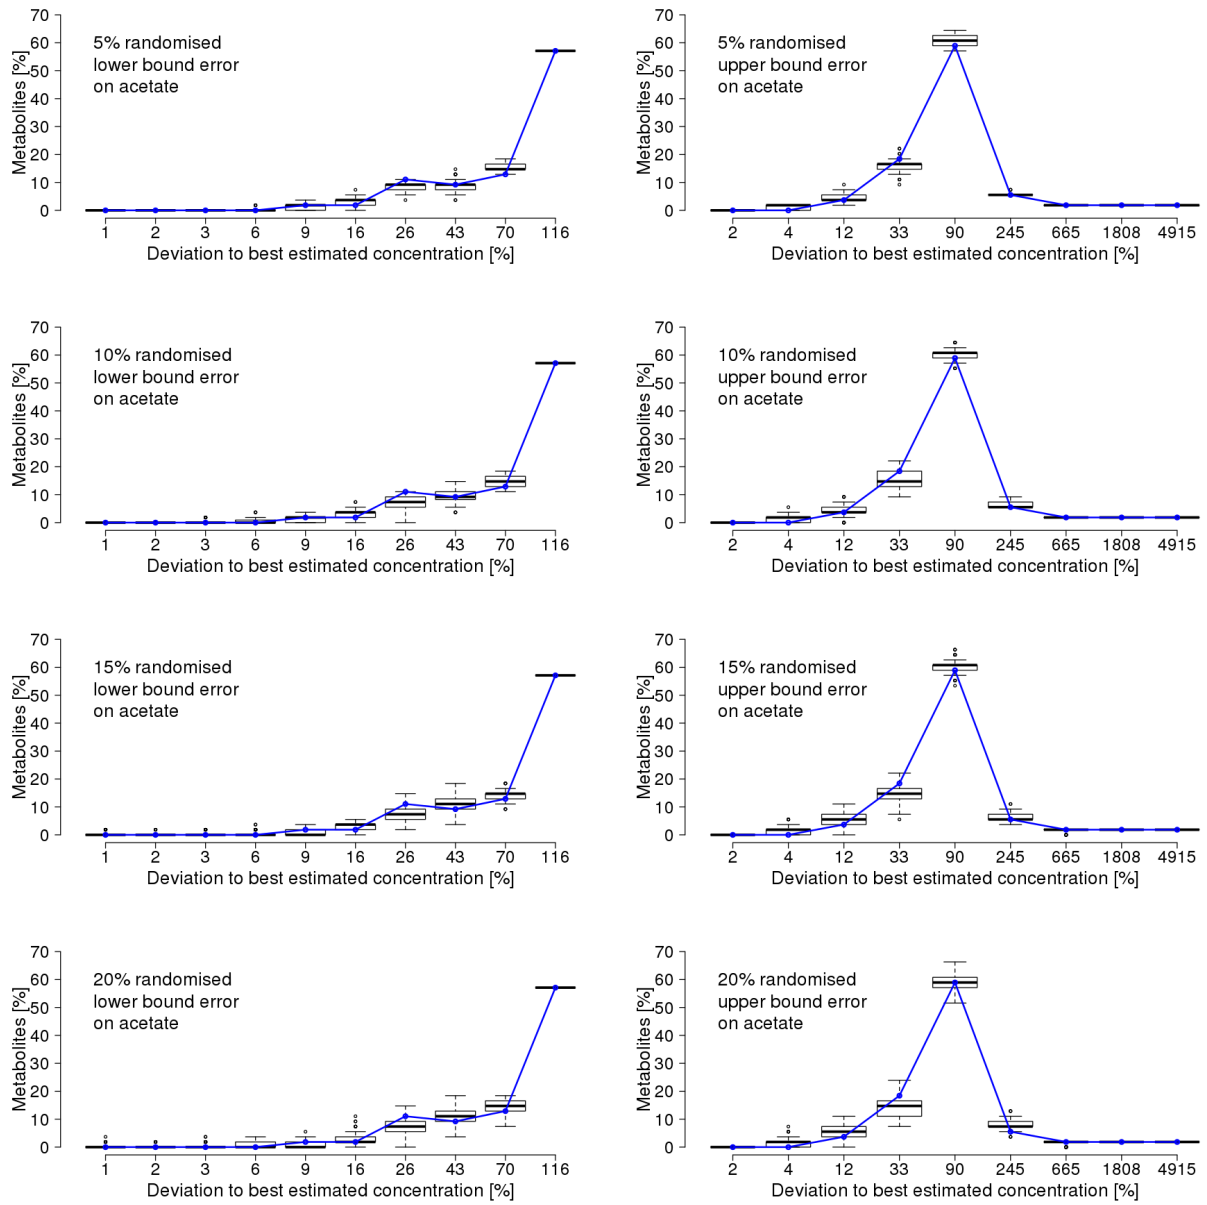

Table S8 ends.



Table S9: Infeasible patterns found in model M2 and M3, when *E. coli* is grown on glucose, acetate or glycerol. The minus in front of the reaction denotes the reverse direction.

|                |         |         |        |      |       |       |
|----------------|---------|---------|--------|------|-------|-------|
| M2 on acetate  | -ACALD  |         |        |      |       |       |
|                | -MDH    |         |        |      |       |       |
|                | -TPI    | -SUCOAS | PGK    |      |       | -GAPD |
| M2 on glycerol | -ACALD  |         |        |      |       |       |
|                | -MDH    |         |        |      |       |       |
|                | -ENO    | -GLUDy  | PGM    |      |       |       |
|                | -FBA    | -SUCOAS | -GAPD  |      |       |       |
|                | -FBA    | PTAr    | PGK    |      |       | -GAPD |
| M2 on glucose  | -ACALD  |         |        |      |       |       |
|                | -MDH    |         |        |      |       |       |
|                | -GLUDy  | ACONTb  |        |      |       |       |
|                | -ENO    | -GLUDy  | PGM    |      |       |       |
|                | -FBA    | -GAPD   | PGK    |      |       |       |
|                | -GAPD   | -SUCOAS | PGK    |      |       |       |
| M3 on glucose  | -ACALD  |         |        |      |       |       |
|                | -MDH    |         |        |      |       |       |
|                | -GLUDy  | ACONTb  |        |      |       |       |
|                | -ENO    | -GLUDy  | PGM    |      |       |       |
|                | -FBA    | -GAPD   | PGK    |      |       |       |
|                | -GAPD   | -SUCOAS | PGK    |      |       |       |
|                | -GLUDy  | FUM     |        |      |       |       |
|                | -MTHFC  | FUM     |        |      |       |       |
|                | -MTHFC  | ACONTb  |        |      |       |       |
|                | -PTAr   | -SUCOAS |        |      |       |       |
|                | -GAPD   | -TPI    | PGK    |      |       |       |
|                | -ENO    | G5SADs  | P5CR   | PGM  |       |       |
|                | PTAr    | ACONTb  | G5SADs | G5SD | GLU5K | P5CR  |
|                | -SUCOAS | ACONTb  | G5SADs | G5SD | GLU5K | P5CR  |
|                | -SUCOAS | FUM     | G5SADs | G5SD | GLU5K | P5CR  |

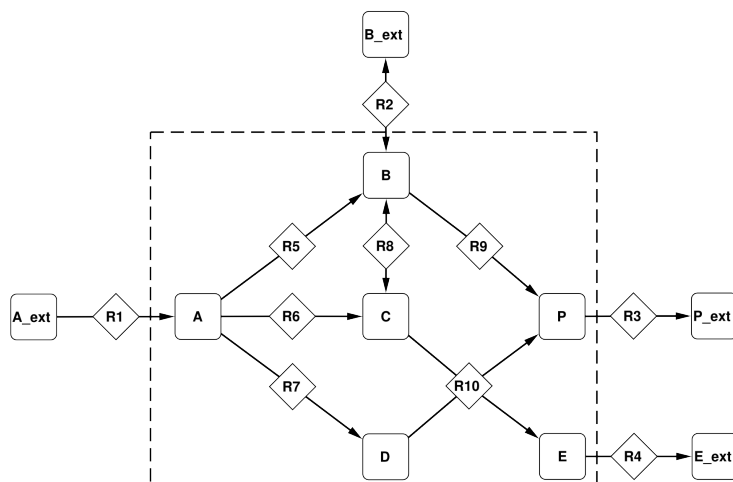

Figure S5: Toy network: This network has six internal metabolites (A,B,C,D,E,P) and 10 reactions that are used by *efmtool*. Reactions  $R_2$  and  $R_8$  are reversible.

### Proof of safe removal of thermodynamically infeasible EFMs

**EFM enumeration by *efmtool*** First, we want to show how EFMs are enumerated by *efmtool*. For this purpose we use the same example as the one in the supplementary material of <sup>4</sup>. Since we want to emphasize on the thermodynamics of EFMs we do not consider the compression methods, adjacency tests and the tree method of the *efmtool* here.

### Model

The example is built on the model of <sup>5</sup> (Fig. S5) and has the following stoichiometric matrix:

|     | $R_1$ | $R_2$ | $R_3$ | $R_4$ | $R_5$ | $R_6$ | $R_7$ | $R_8$ | $R_9$ | $R_{10}$ |
|-----|-------|-------|-------|-------|-------|-------|-------|-------|-------|----------|
| $A$ | 1     | 0     | 0     | 0     | -1    | -1    | -1    | 0     | 0     | 0        |
| $B$ | 0     | 1     | 0     | 0     | 1     | 0     | 0     | -1    | -1    | 0        |
| $C$ | 0     | 0     | 0     | 0     | 0     | 1     | 0     | 1     | 0     | -1       |
| $D$ | 0     | 0     | 0     | 0     | 0     | 0     | 1     | 0     | 0     | -1       |
| $E$ | 0     | 0     | 0     | -1    | 0     | 0     | 0     | 0     | 0     | 1        |
| $P$ | 0     | 0     | -1    | 0     | 0     | 0     | 0     | 0     | 1     | 1        |

The rows of the stoichiometric matrix represent the internal metabolites (A,B,C,D,E,P) and the columns the reactions ( $R_1, R_2, R_3, R_4, R_5, R_6, R_7, R_8, R_9, R_{10}$ ).

## Initialization phase

The algorithm starts with the initialization phase and splits the reversible reactions ( $R_2$  and  $R_8$ ) into two irreversible reactions each.

|     | $R_1$ | $R_2$ | $R_{2r}$ | $R_3$ | $R_4$ | $R_5$ | $R_6$ | $R_7$ | $R_8$ | $R_{8r}$ | $R_9$ | $R_{10}$ |
|-----|-------|-------|----------|-------|-------|-------|-------|-------|-------|----------|-------|----------|
| $A$ | 1     | 0     | 0        | 0     | 0     | -1    | -1    | -1    | 0     | 0        | 0     | 0        |
| $B$ | 0     | 1     | -1       | 0     | 0     | 1     | 0     | 0     | -1    | 1        | -1    | 0        |
| $C$ | 0     | 0     | 0        | 0     | 0     | 0     | 1     | 0     | 1     | -1       | 0     | -1       |
| $D$ | 0     | 0     | 0        | 0     | 0     | 0     | 0     | 1     | 0     | 0        | 0     | -1       |
| $E$ | 0     | 0     | 0        | 0     | -1    | 0     | 0     | 0     | 0     | 0        | 0     | 1        |
| $P$ | 0     | 0     | 0        | -1    | 0     | 0     | 0     | 0     | 0     | 0        | 1     | 1        |

In the next step the kernel matrix is computed and then the rows are permuted

$$\begin{array}{l|cccccc}
R_1 & 0 & 1 & -1 & 1 & 0 & 2 \\
R_2 & 1 & -1 & 1 & -1 & 1 & 0 \\
R_{2r} & 1 & 0 & 0 & 0 & 0 & 0 \\
R_3 & 0 & 0 & 0 & 0 & 1 & 1 \\
R_4 & 0 & 0 & 0 & 0 & 0 & 1 \\
R_5 & 0 & 1 & 0 & 0 & 0 & 0 \\
R_6 & 0 & 0 & -1 & 1 & 0 & 1 \\
R_7 & 0 & 0 & 0 & 0 & 0 & 1 \\
R_8 & 0 & 0 & 1 & 0 & 0 & 0 \\
R_{8r} & 0 & 0 & 0 & 1 & 0 & 0 \\
R_9 & 0 & 0 & 0 & 0 & 1 & 0 \\
R_{10} & 0 & 0 & 0 & 0 & 0 & 1
\end{array}
\Rightarrow
\begin{array}{l|cccccc}
R_{2r} & 1 & 0 & 0 & 0 & 0 & 0 \\
R_5 & 0 & 1 & 0 & 0 & 0 & 0 \\
R_8 & 0 & 0 & 1 & 0 & 0 & 0 \\
R_{8r} & 0 & 0 & 0 & 1 & 0 & 0 \\
R_9 & 0 & 0 & 0 & 0 & 1 & 0 \\
R_4 & 0 & 0 & 0 & 0 & 0 & 1 \\
R_{10} & 0 & 0 & 0 & 0 & 0 & 1 \\
R_7 & 0 & 0 & 0 & 0 & 0 & 1 \\
R_3 & 0 & 0 & 0 & 0 & 1 & 1 \\
R_6 & 0 & 0 & -1 & 1 & 0 & 1 \\
R_1 & 0 & 1 & -1 & 1 & 0 & 2 \\
R_2 & 1 & -1 & 1 & -1 & 1 & 0
\end{array}$$

### Iterations and thermodynamic feasibility checks

In the iteration phase all EFMs are enumerated. The EFMs are represented by the columns of the generated matrix. Here, in the first step the first nine lines are easily converted to binary values as they contain no negative values. We use  $\bullet$  for reactions carrying a flux and  $\star$  for non active

reactions in the binary notation (note that <sup>4</sup> use the inverse logic in their publication).

|          |   |    |    |    |   |   |
|----------|---|----|----|----|---|---|
| $R_{2r}$ | ● | *  | *  | *  | * | * |
| $R_5$    | * | ●  | *  | *  | * | * |
| $R_8$    | * | *  | ●  | *  | * | * |
| $R_{8r}$ | * | *  | *  | ●  | * | * |
| $R_9$    | * | *  | *  | *  | ● | * |
| $R_4$    | * | *  | *  | *  | * | ● |
| $R_{10}$ | * | *  | *  | *  | * | ● |
| $R_7$    | * | *  | *  | *  | * | ● |
| $R_3$    | * | *  | *  | *  | ● | ● |
| $R_6$    | 0 | 0  | -1 | 1  | 0 | 1 |
| $R_1$    | 0 | 1  | -1 | 1  | 0 | 2 |
| $R_2$    | 1 | -1 | 1  | -1 | 1 | 0 |

At the start of each iteration the binary part of modes with positive or negative values on the next numeric position ( $R_6$ ) is checked for thermodynamic feasibility. For this purpose a linear problem is created containing constraints for all reactions in a column carrying a flux (denoted with ●). In this example we assume that it is thermodynamically not feasible that  $R_8$  and  $R_{10}$  are active together in the same EFM. In other words, it is not allowed that both reactions are labeled with ● in the same column. As none of the modes are infeasible so far we proceed with the next iteration.

As the next row has one negative value in column three the corresponding mode (column) is removed and combined with all modes containing a positive value (column 4 and 6). The combination is performed by a logic OR which is described by the following truth table:

Table **S10**: Truth table for the combination in *efmtool*

| column A | column B | new column |
|----------|----------|------------|
| •        | •        | •          |
| •        | *        | •          |
| *        | •        | •          |
| *        | *        | *          |

Without thermodynamic check

|          |   |    |    |   |   |   |   |
|----------|---|----|----|---|---|---|---|
| $R_{2r}$ | • | *  | *  | * | * | * | * |
| $R_5$    | * | •  | *  | * | * | * | * |
| $R_8$    | * | *  | *  | * | * | • | • |
| $R_{8r}$ | * | *  | •  | * | * | • | * |
| $R_9$    | * | *  | *  | • | * | * | * |
| $R_4$    | * | *  | *  | * | • | * | • |
| $R_{10}$ | * | *  | *  | * | • | * | • |
| $R_7$    | * | *  | *  | * | • | * | • |
| $R_3$    | * | *  | *  | • | • | * | • |
| $R_6$    | * | *  | •  | * | • | * | * |
| $R_1$    | 0 | 1  | 1  | 0 | 2 | 0 | 1 |
| $R_2$    | 1 | -1 | -1 | 1 | 0 | 0 | 1 |

With thermodynamic check

|          |   |    |    |   |   |   |   |
|----------|---|----|----|---|---|---|---|
| $R_{2r}$ | • | *  | *  | * | * | * | * |
| $R_5$    | * | •  | *  | * | * | * | * |
| $R_8$    | * | *  | *  | * | * | * | • |
| $R_{8r}$ | * | *  | •  | * | * | * | • |
| $R_9$    | * | *  | *  | • | * | * | * |
| $R_4$    | * | *  | *  | * | • | * | * |
| $R_{10}$ | * | *  | *  | * | • | * | * |
| $R_7$    | * | *  | *  | * | • | * | * |
| $R_3$    | * | *  | *  | • | • | * | * |
| $R_6$    | * | *  | •  | * | • | * | * |
| $R_1$    | 0 | 1  | 1  | 0 | 2 | 0 | 0 |
| $R_2$    | 1 | -1 | -1 | 1 | 0 | 0 | 0 |

In the left table all modes after this iteration step are shown. In the last column,  $R_8$  and  $R_{10}$  are both marked with •. Therefore this mode is thermodynamically infeasible. As this mode has a positive value in row  $R_1$ , it is checked at the start of the next iteration and removed immediately (right table).

The next step is again a simple conversion from numeric to binary values as there are no negative values in row  $R_1$ .



Without thermodynamic check

|          |   |    |    |   |   |   |   |
|----------|---|----|----|---|---|---|---|
| $R_{2r}$ | ● | *  | *  | * | * | * | * |
| $R_5$    | * | ●  | *  | * | * | * | * |
| $R_8$    | * | *  | *  | * | * | ● | ● |
| $R_{8r}$ | * | *  | ●  | * | * | ● | * |
| $R_9$    | * | *  | *  | ● | * | * | * |
| $R_4$    | * | *  | *  | * | ● | * | ● |
| $R_{10}$ | * | *  | *  | * | ● | * | ● |
| $R_7$    | * | *  | *  | * | ● | * | ● |
| $R_3$    | * | *  | *  | ● | ● | * | ● |
| $R_6$    | * | *  | ●  | * | ● | * | * |
| $R_1$    | * | ●  | ●  | * | ● | * | ● |
| $R_2$    | 1 | -1 | -1 | 1 | 0 | 0 | 1 |

With thermodynamic check

|          |   |    |    |   |   |   |   |
|----------|---|----|----|---|---|---|---|
| $R_{2r}$ | ● | *  | *  | * | * | * | * |
| $R_5$    | * | ●  | *  | * | * | * | * |
| $R_8$    | * | *  | *  | * | * | * | ● |
| $R_{8r}$ | * | *  | ●  | * | * | * | ● |
| $R_9$    | * | *  | *  | ● | * | * | * |
| $R_4$    | * | *  | *  | * | ● | * | * |
| $R_{10}$ | * | *  | *  | * | ● | * | * |
| $R_7$    | * | *  | *  | * | ● | * | * |
| $R_3$    | * | *  | *  | ● | ● | * | * |
| $R_6$    | * | *  | ●  | * | ● | * | * |
| $R_1$    | * | ●  | ●  | * | ● | * | * |
| $R_2$    | 1 | -1 | -1 | 1 | 0 | 0 | 0 |

In the next step two columns with negative values (2 and 3) have to be combined with positive columns (1,4,7 in left table and 1,4 in right table).

|          | Without thermodynamic check |   |   |   |   |   |   |   |   |   | With thermodynamic check |   |   |   |   |   |   |   |  |  |
|----------|-----------------------------|---|---|---|---|---|---|---|---|---|--------------------------|---|---|---|---|---|---|---|--|--|
| $R_{2r}$ | •                           | * | * | * | * | • | • | * | * | * | •                        | * | * | * | • | • | * | * |  |  |
| $R_5$    | *                           | * | * | * | * | • | * | • | • | * | *                        | * | * | * | • | * | • | * |  |  |
| $R_8$    | *                           | * | * | • | • | * | * | • | * | * | *                        | * | * | • | * | * | * | * |  |  |
| $R_{8r}$ | *                           | * | * | • | * | * | • | * | * | • | *                        | * | * | • | * | • | * | • |  |  |
| $R_9$    | *                           | • | * | * | * | * | * | * | • | • | *                        | • | * | * | * | * | • | • |  |  |
| $R_4$    | *                           | * | • | * | • | * | * | • | * | * | *                        | * | • | * | * | * | * | * |  |  |
| $R_{10}$ | *                           | * | • | * | • | * | * | • | * | * | *                        | * | • | * | * | * | * | * |  |  |
| $R_7$    | *                           | * | • | * | • | * | * | • | * | * | *                        | * | • | * | * | * | * | * |  |  |
| $R_3$    | *                           | • | • | * | • | * | * | • | • | • | *                        | • | • | * | * | * | • | • |  |  |
| $R_6$    | *                           | * | • | * | * | * | • | * | * | • | *                        | * | • | * | * | • | * | • |  |  |
| $R_1$    | *                           | * | • | * | • | • | • | • | • | • | *                        | * | • | * | • | • | • | • |  |  |
| $R_2$    | •                           | • | * | * | • | * | * | * | * | * | •                        | • | * | * | * | * | * | * |  |  |

In the left table two new thermodynamically infeasible EFMs which do not appear in the right table are created.

### Postprocessing phase

In the postprocessing step of *efmtool* the rows of the matrix are reordered to restore the original order of the reactions:

Without thermodynamic check

|          |   |   |   |   |   |   |   |   |   |
|----------|---|---|---|---|---|---|---|---|---|
| $R_1$    | * | * | • | * | • | • | • | • | • |
| $R_2$    | • | • | * | * | • | * | * | * | * |
| $R_{2r}$ | • | * | * | * | * | • | • | * | * |
| $R_3$    | * | • | • | * | • | * | * | • | • |
| $R_4$    | * | * | • | * | • | * | * | • | * |
| $R_5$    | * | * | * | * | * | • | * | • | • |
| $R_6$    | * | * | • | * | * | * | • | * | • |
| $R_7$    | * | * | • | * | • | * | * | • | * |
| $R_8$    | * | * | * | • | • | * | * | • | * |
| $R_{8r}$ | * | * | * | • | * | * | • | * | • |
| $R_9$    | * | • | * | * | * | * | * | • | • |
| $R_{10}$ | * | * | • | * | • | * | * | • | * |

With thermodynamic check

|          |   |   |   |   |   |   |   |   |
|----------|---|---|---|---|---|---|---|---|
| $R_1$    | * | * | • | * | • | • | • | • |
| $R_2$    | • | • | * | * | * | * | * | * |
| $R_{2r}$ | • | * | * | * | • | • | * | * |
| $R_3$    | * | • | • | * | * | * | • | • |
| $R_4$    | * | * | • | * | * | * | * | * |
| $R_5$    | * | * | * | * | • | * | • | * |
| $R_6$    | * | * | • | * | * | • | * | • |
| $R_7$    | * | * | • | * | * | * | * | * |
| $R_8$    | * | * | * | • | * | * | * | * |
| $R_{8r}$ | * | * | * | • | * | • | * | • |
| $R_9$    | * | • | * | * | * | * | • | • |
| $R_{10}$ | * | * | • | * | * | * | * | * |

In the next step the binary values are converted back to numeric values:

| Without thermodynamic check |   |   |   |   |   |   |   |   |   | With thermodynamic check |          |   |   |   |   |   |   |   |   |   |
|-----------------------------|---|---|---|---|---|---|---|---|---|--------------------------|----------|---|---|---|---|---|---|---|---|---|
| $R_1$                       | 0 | 0 | 2 | 0 | 1 | 1 | 1 | 2 | 1 | 1                        | $R_1$    | 0 | 0 | 2 | 0 | 1 | 1 | 1 | 1 | 1 |
| $R_2$                       | 1 | 1 | 0 | 0 | 1 | 0 | 0 | 0 | 0 | 0                        | $R_2$    | 1 | 1 | 0 | 0 | 0 | 0 | 0 | 0 | 0 |
| $R_{2r}$                    | 1 | 0 | 0 | 0 | 0 | 1 | 1 | 0 | 0 | 0                        | $R_{2r}$ | 1 | 0 | 0 | 0 | 1 | 1 | 0 | 0 | 0 |
| $R_3$                       | 0 | 1 | 1 | 0 | 1 | 0 | 0 | 1 | 1 | 1                        | $R_3$    | 0 | 1 | 1 | 0 | 0 | 0 | 1 | 1 | 1 |
| $R_4$                       | 0 | 0 | 1 | 0 | 1 | 0 | 0 | 1 | 0 | 0                        | $R_4$    | 0 | 0 | 1 | 0 | 0 | 0 | 0 | 0 | 0 |
| $R_5$                       | 0 | 0 | 0 | 0 | 0 | 1 | 0 | 1 | 1 | 0                        | $R_5$    | 0 | 0 | 0 | 0 | 1 | 0 | 1 | 0 | 0 |
| $R_6$                       | 0 | 0 | 1 | 0 | 0 | 0 | 1 | 0 | 0 | 1                        | $R_6$    | 0 | 0 | 1 | 0 | 0 | 1 | 0 | 1 | 1 |
| $R_7$                       | 0 | 0 | 1 | 0 | 1 | 0 | 0 | 1 | 0 | 0                        | $R_7$    | 0 | 0 | 1 | 0 | 0 | 0 | 0 | 0 | 0 |
| $R_8$                       | 0 | 0 | 0 | 1 | 1 | 0 | 0 | 1 | 0 | 0                        | $R_8$    | 0 | 0 | 0 | 1 | 0 | 0 | 0 | 0 | 0 |
| $R_{8r}$                    | 0 | 0 | 0 | 1 | 0 | 0 | 1 | 0 | 0 | 1                        | $R_{8r}$ | 0 | 0 | 0 | 1 | 0 | 1 | 0 | 1 | 1 |
| $R_9$                       | 0 | 1 | 0 | 0 | 0 | 0 | 0 | 0 | 1 | 1                        | $R_9$    | 0 | 1 | 0 | 0 | 0 | 0 | 1 | 1 | 1 |
| $R_{10}$                    | 0 | 0 | 1 | 0 | 1 | 0 | 0 | 1 | 0 | 0                        | $R_{10}$ | 0 | 0 | 1 | 0 | 0 | 0 | 0 | 0 | 0 |

Rows representing reversible reactions are combined and modes with futile cycles (1. and 4. column) are removed.

| Without thermodynamic check |        |        |        |        |        |        |        |        | With thermodynamic check |        |        |        |        |        |
|-----------------------------|--------|--------|--------|--------|--------|--------|--------|--------|--------------------------|--------|--------|--------|--------|--------|
|                             | $EM_1$ | $EM_2$ | $EM_3$ | $EM_4$ | $EM_5$ | $EM_6$ | $EM_7$ | $EM_8$ | $EM_1$                   | $EM_2$ | $EM_4$ | $EM_5$ | $EM_7$ | $EM_8$ |
| $R_1$                       | 0      | 2      | 1      | 1      | 1      | 2      | 1      | 1      | 0                        | 2      | 1      | 1      | 1      | 1      |
| $R_2$                       | 1      | 0      | 1      | -1     | -1     | 0      | 0      | 0      | 1                        | 0      | -1     | -1     | 0      | 0      |
| $R_3$                       | 1      | 1      | 1      | 0      | 0      | 1      | 1      | 1      | 1                        | 1      | 0      | 0      | 1      | 1      |
| $R_4$                       | 0      | 1      | 1      | 0      | 0      | 1      | 0      | 0      | 0                        | 1      | 0      | 0      | 0      | 0      |
| $R_5$                       | 0      | 0      | 0      | 1      | 0      | 1      | 1      | 0      | 0                        | 0      | 1      | 0      | 1      | 0      |
| $R_6$                       | 0      | 1      | 0      | 0      | 1      | 0      | 0      | 1      | 0                        | 1      | 0      | 1      | 0      | 1      |
| $R_7$                       | 0      | 1      | 1      | 0      | 0      | 1      | 0      | 0      | 0                        | 1      | 0      | 0      | 0      | 0      |
| $R_8$                       | 0      | 0      | 1      | 0      | -1     | 1      | 0      | -1     | 0                        | 0      | 0      | -1     | 0      | -1     |
| $R_9$                       | 1      | 0      | 0      | 0      | 0      | 0      | 1      | 1      | 1                        | 0      | 0      | 0      | 1      | 1      |
| $R_{10}$                    | 0      | 1      | 1      | 0      | 0      | 1      | 0      | 0      | 0                        | 1      | 0      | 0      | 0      | 0      |

The toy network results in 8 EFMs(left table), whereas in this example  $EFM_3$  and  $EFM_6$  are thermodynamically infeasible (right table).

\* Feasible EFMs are never removed As shown before, new EFMs are generated by a combination of previously calculated EFMs. Here we show that thermodynamically infeasible modes can never contribute to new thermodynamically feasible modes and can safely be removed during the iteration phase.

- In the main part of this paper we have shown that the constraints of the linear program for checking the feasibility of an EFM are defined by all reactions carrying a flux in this mode.

- Here, a reaction carrying a flux is marked by •
- It is shown in the truth table (Table S10) that an active reaction will always stay active by the combination of adjacent candidates, as it is done by *efmtool*.
- Hence, a combined mode always contains all active reactions of the two single contributing modes.
- It is not possible to turn an infeasible flux into a feasible flux by adding additional reactions.
- Thus, a combination of an infeasible EFM (e.g. defined by NET analysis) with any other EFM will always result in an infeasible EFM and can therefore be removed without loss of feasible EFMs.

### Calculation of the transformed standard Gibbs free energy of formation

$$\Delta_f G^0 = -RT \ln \left\{ \sum_i \exp \left[ -\Delta_f G_i^0(pH, I)/RT \right] \right\} \quad (1a)$$

$$\Delta_f G_i^0(pH, I) = \Delta_f G_i^0 - \Delta_f G_i^0(pH) - \Delta_f G_i^0(I) \quad (1b)$$

$$\Delta_f G_i^0(pH) = H_i^+ RT \ln (10^{-pH}) \quad (1c)$$

$$\Delta_f G_i^0(I) = \sqrt{I} A \frac{z_i^2 - H_i^+}{1 + \sqrt{I} B} \quad (1d)$$

$$A = 2.91482 \text{ kJ mol}^{-1} \text{ M}^{-0.5}, \quad B = 1.6 \text{ M}^{-0.5} \quad (1e)$$

where the summation over  $i$  has to be carried out over all net charges,  $z_i$ , of a metabolite.  $\Delta_f G_i^0(pH, I)$  denotes the standard transformed Gibbs free energy of formation for the metabolite corrected for

ionic strength,  $I$  [ $\Delta_f G_i^0(I)$ ], and pH [ $\Delta_f G_i^0(pH)$ ] at charge state  $z_i$ . The standard Gibbs free energy of formation,  $\Delta_f G_i^0$ , was estimated using the online version of eQuilibrator<sup>6</sup>. Finally,  $H^+$  denotes the number of protons while A and B are constants<sup>7</sup>. We set

$$I = 0.15 \text{ M}, \quad pH = 7, \quad \text{and} \quad T = 310.15 \text{ K (37 }^\circ\text{C)}. \quad (2)$$

Values for the metabolite's  $\Delta_f G'^0$  are listed in the supplementary material, file 2.

1. Smoot, M. E., Ono, K., Ruscheinski, J., Wang, P.-L. & Ideker, T. Cytoscape 2.8: new features for data integration and network visualization. *Bioinformatics* **27**, 431–432; DOI:10.1093/bioinformatics/btq675 (2011).
2. Orth, J. D., Fleming, R. M. T. & Palsson, B. Ø. Reconstruction and Use of Microbial Metabolic Networks: the Core Escherichia coli Metabolic Model as an Educational Guide. *EcoSal* (2010).
3. Bennett, B. D. *et al.* Absolute metabolite concentrations and implied enzyme active site occupancy in Escherichia coli. *Nat. Chem. Biol.* **5**, 593–599; DOI:10.1038/nchembio.186 (2009).
4. Terzer, M. & Stelling, J. Large-scale computation of elementary flux modes with bit pattern trees. *Bioinformatics* **24**, 2229–2235; DOI:10.1093/bioinformatics/btn401 (2008).
5. Klamt, S. & Stelling, J. *Stoichiometric and constraint-based modeling*, 73–96; DOI:10.7551/mitpress/9780262195485.003.0005 (MIT Press (Cambridge / MA), 2006).
6. Flamholz, A., Noor, E., Bar-Even, A. & Milo, R. eQuilibrator—the biochemical thermodynamics calculator. *Nucleic Acids Res.* **40**, D770–D775; DOI:10.1093/nar/gkr874 (2012).
7. Alberty, R. A. *Thermodynamics of Biochemical Reactions* (John Wiley & Sons, Inc., New Jersey, 2003).
